# Supplementary material for: Overexpression of AtCSP4 affects late stages of embryo development in Arabidopsis
Source: PubMed Central journal article supplement — J Exp Bot. 2011 Jan 31;62(6):2079–91. doi: 10.1093/jxb/erq400 (PMC3060687; doi:10.1093/jxb/erq400), 2011-01-31
Supplement: supp_erq400_00049007-file001.pdf [file supp_erq400_00049007-file001.pdf]

**Overexpression of *AtCSP4* affects late stages of embryo development in Arabidopsis**

**AUTHORS:**

Yongil Yang<sup>1,2</sup> and Dale Karlson<sup>1,3</sup>

**INSTITUTION ADDRESS:**

<sup>1</sup>Division of Plant & Soil Sciences, West Virginia University, Morgantown, WV 26506-6108

**CURRENT AFFILIATIONS:**

<sup>2</sup>Institute of Biological Chemistry, Washington State University, Pullman, WA 99164-6340

<sup>3</sup>Monsanto Company, 110 TW Alexander Drive, RTP, NC 27709

**RUNNING TITLE :**

AtCSP4 function during development

**KEYWORD :**

**FOOTNOTE:**

This research was supported by a grant from the National Science Foundation (IBN-0416945) to D.K.

**Supplementary Table 1. Primer list for AtCSP4 transcript detection and amplicon length of PCR product with the R1 primer**

| Primer name | Sequence (5'-3')        | Amplicon length (b.p.) |
|-------------|-------------------------|------------------------|
| F1          | CACCATGAGCGGAGGAGGAGAC  | 777                    |
| R1          | TTTCTCAAATCACAAAGGAACCA | 777                    |

**Supplementary Table 2. Primer list for semi-quantitative RT-PCR analysis**

| Primer Name | Forward Sequence (5'-3') | Reverse Sequence (5'-3') |
|-------------|--------------------------|--------------------------|
| AAC1        | CGGCGATTCCAGGGAACATTGTGG | GTGCTCGACTCTGGAGATGGTGTG |
| AP1         | CTTACGCCGAAAGACAGCTT     | ACTGCTCCTGTTGAGCCCTA     |
| CAL         | TAGCAGGCTTAAGCCAAGA      | GTTGTGGCTGTGGTACATCG     |
| AG          | AGGCAATTGATGGGTGAGAC     | CTAACTGGAGAGCGGTTTGG     |
| FUL         | GGGGGAAGATCTTGATTCGT     | AGTTTGGTTCCGTCAACGAC     |
| SHP2        | CGACGCAATGGTTTACTCAA     | CGGACACGACTGATTCCTTT     |
| FUS3        | GTGGCAAGTGTTGATCATGG     | CGTGAAAACCGTCCAAATCT     |
| LEC1        | TTGAACTTGGACCAGCACAG     | AAGCTTGCTCATAGCCCAA      |
| MEA         | TTGCTGCTAATCGTGAATGC     | TCATCAACTTGGCGTAGCAG     |
| FIS2        | GCTTGATTCCATGTGGAGGT     | CTGTGCCACGAGGTAAGTCA     |
| FIE         | TTGTGGGTCATGGAGATTCA     | TGTGGGGAATTTTGTGGAT      |

**Supplementary Table 3. List of context sequence and amplicon lengths for Taq-Man probes**

| Primer name                   | Sequence (5'-3')          | Amplicon length (b.p.) |
|-------------------------------|---------------------------|------------------------|
| <i>Actin 2</i><br>NM_180280.1 | CTGGATCGGTGGTTCCATTCTTGCT | 85                     |
| <i>AtCSP4</i><br>NM_127676.2  | TAATTAGGACTTGTGGTTGTTATGG | 142                    |



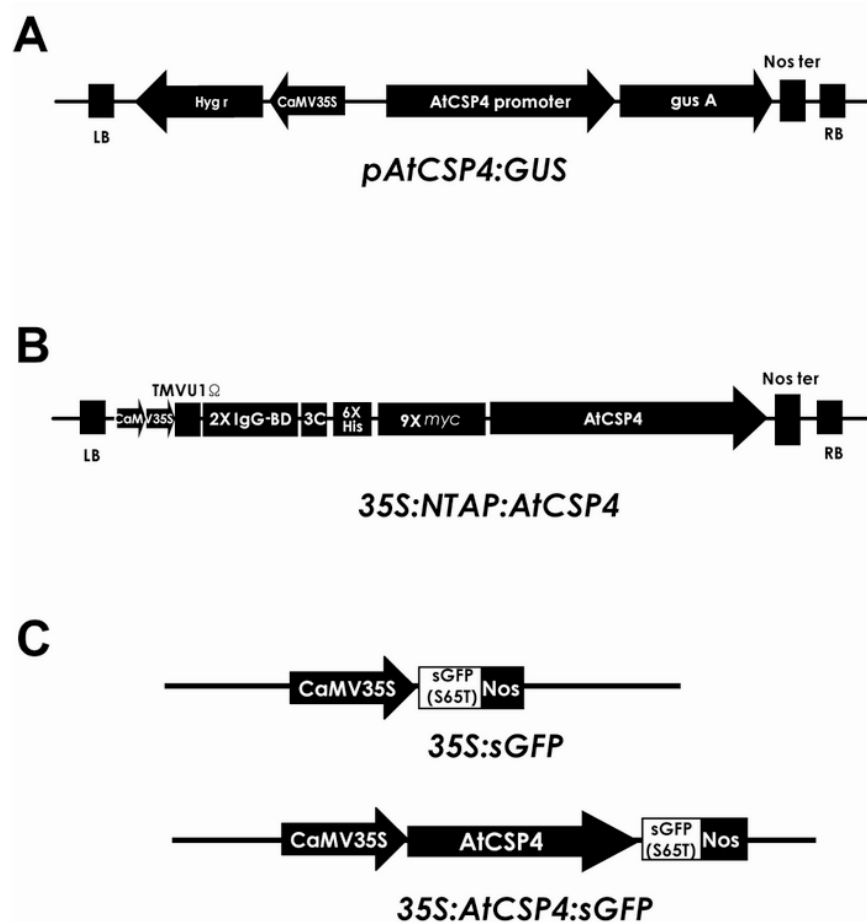

**Supplementary Figure 2. Schematic representation for AtCSP4 gene functional analysis**

(A) pAtCSP4:GUS expression in transgenic Arabidopsis. A -2 kb promoter region of AtCSP4 was inserted into the pCAMBIA1303 binary vector (pAtCSP4:GUS). (B) Gene construct of 35S:NTAP:AtCSP4. (C) Gene construct of sGFP and AtCSP4:sGFP vectors. The coding region of AtCSP4 was cloned into the sGFP(S65T) vector for transient expression via a particle bombardment system into onion epidermal peels.
